# Supplementary material for: Intranasal Lentiviral Vector-Mediated Antibody Delivery Confers Reduction of SARS-CoV-2 Infection in Elderly and Immunocompromised Mice
Source: PubMed Central journal article supplement (PMC9072863; doi:10.3389/fimmu.2022.819058), 2022-04-22

**Figure S1**

| <b>A</b> | RBD Site | ACE2 | NC0321 |
|----------|----------|------|--------|
|          | 403      |      | R      |
|          | 405      |      | D      |
|          | 406      |      | E      |
|          | 408      |      | R      |
|          | 409      |      | Q      |
|          | 414      |      | Q      |
|          | 415      |      | T      |
|          | 416      |      | G      |
|          | 417      | K    | K      |
|          | 421      |      | Y      |
|          | 445      | V    |        |
|          | 446      | G    | G      |
|          | 449      | Y    | Y      |
|          | 453      | Y    | Y      |
|          | 455      | L    | L      |
|          | 456      | F    | F      |
|          | 473      | Y    |        |
|          | 475      | A    | A      |
|          | 476      | G    | G      |
|          | 477      |      | S      |
|          | 484      | E    | E      |
|          | 485      |      | G      |
|          | 486      | F    | F      |
|          | 487      | N    | N      |
|          | 488      | Y    | Y      |
|          | 493      | Q    | Q      |
|          | 494      |      | S      |
|          | 495      |      | Y      |
|          | 496      | G    | G      |
|          | 498      | Q    | Q      |
|          | 500      | T    | T      |
|          | 501      | N    | N      |
|          | 502      | G    | G      |
|          | 503      | V    | V      |
|          | 504      |      | G      |
|          | 505      | Y    | Y      |

| <b>B</b> | RBD  | Length (Å) | NC0321 |
|----------|------|------------|--------|
|          | 505Y | 2.4        | L96R   |
|          | 505Y | 3.4        | L91S   |
|          | 417K | 2.4        | L49Y   |
|          | 501N | 2.2        | L92Y   |
|          | 498Q | 2.9        | L92Y   |
|          | 498Q | 2.9        | L28S   |
|          | 494S | 1.9        | L30S   |
|          | 494S | 3.3        | L31S   |
|          | 494S | 3.3        | L31S   |
|          | 498Q | 2.9        | L28S   |

**Figure S2**

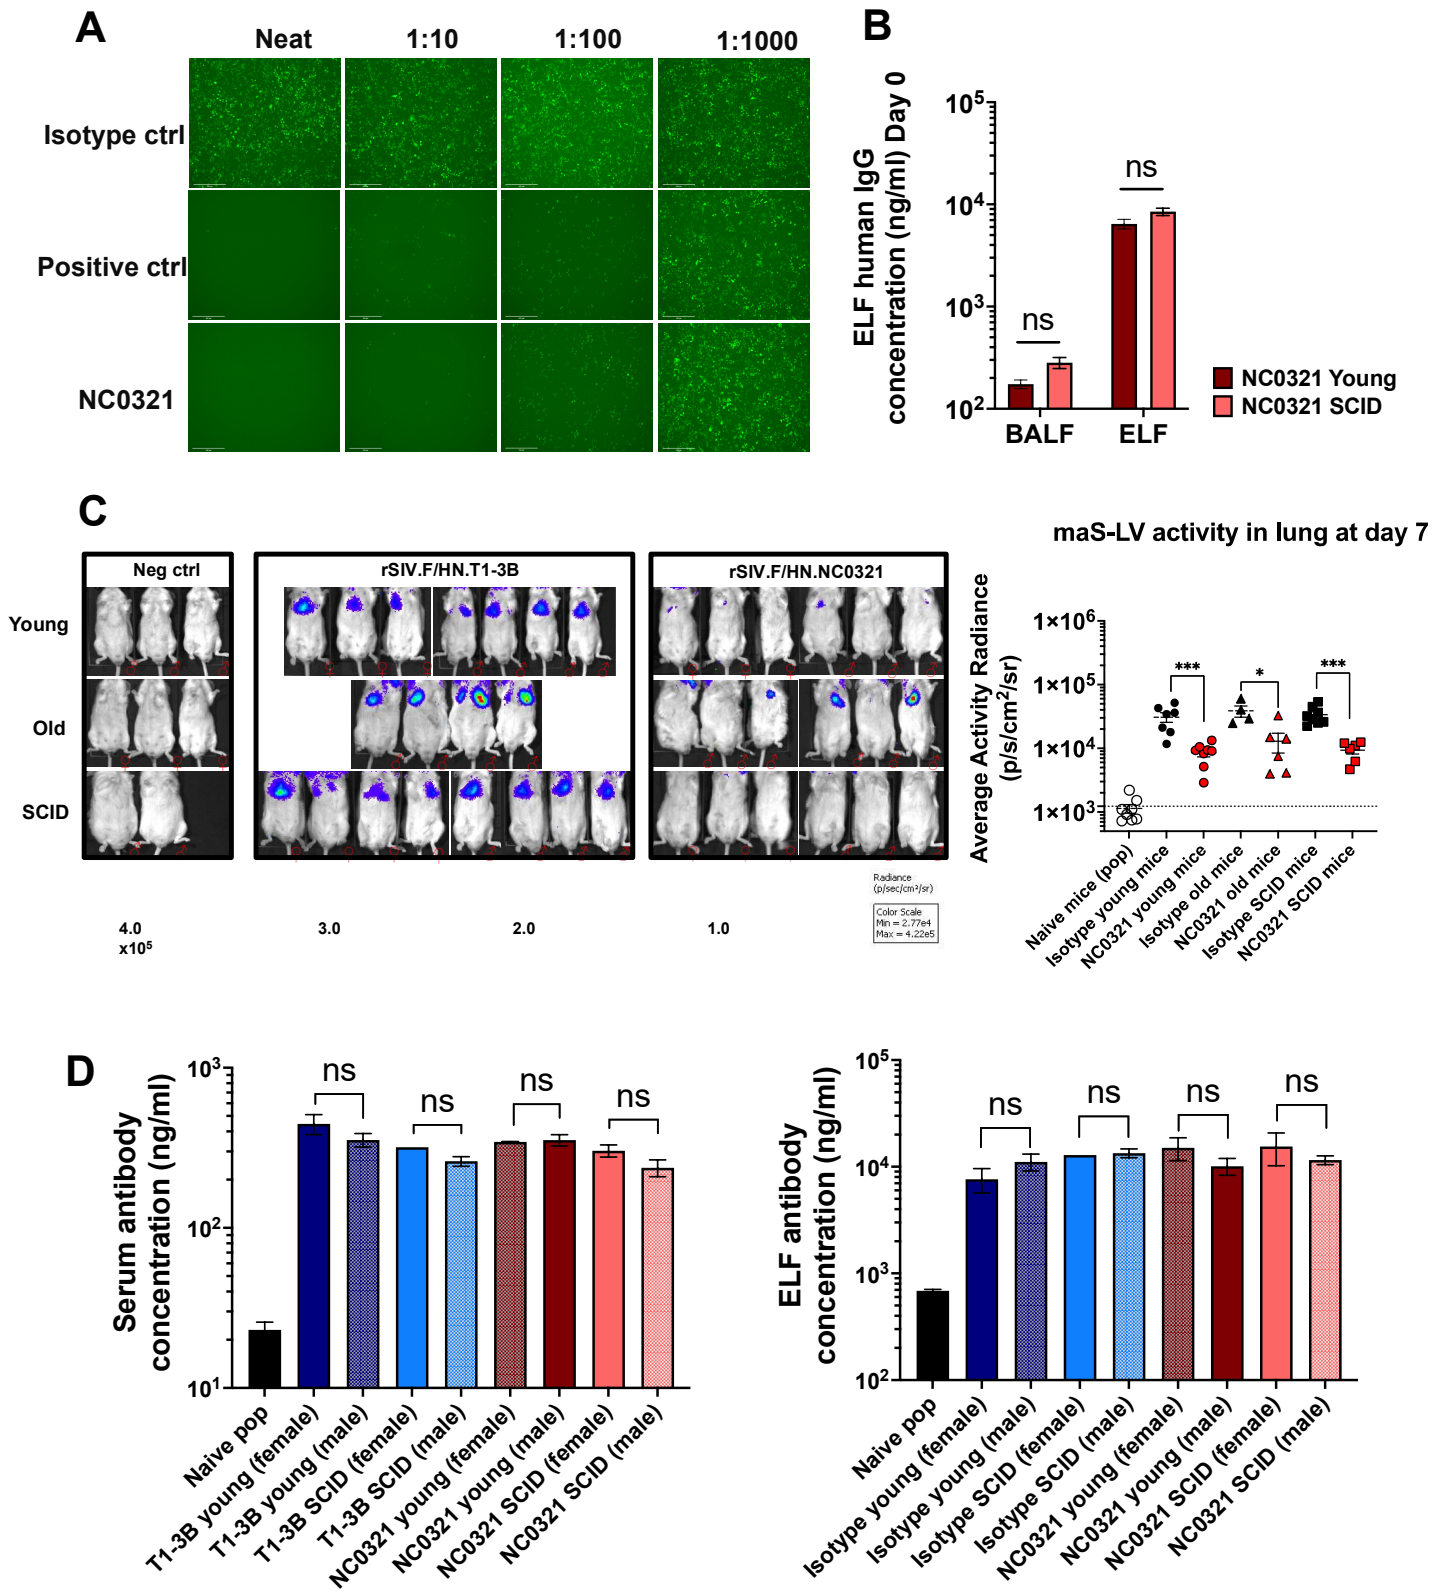

Supplement: DataSheet_1.pdf [file DataSheet_1.pdf]
